# Supplementary material
Source: PubMed Central journal article supplement (PMC4787893)
Supplement: eydd782797.w1_default.pdf [file eydd782797.w1_default.pdf]

**Web table A** Trial characteristics

| <b>Trial</b> | <b>Primary publication?</b>          | <b>Clinical study report available?*</b> | <b>Main inclusion criteria</b>                                                                         | <b>Main exclusion criteria</b>                                                                                                                                  | <b>Region</b>                                     | <b>Primary end point</b> | <b>Secondary end point</b>                                                                           | <b>Time point of measurement†</b>    |
|--------------|--------------------------------------|------------------------------------------|--------------------------------------------------------------------------------------------------------|-----------------------------------------------------------------------------------------------------------------------------------------------------------------|---------------------------------------------------|--------------------------|------------------------------------------------------------------------------------------------------|--------------------------------------|
| 014          | Refs 1-3                             | Ref 4‡                                   | MDD according to DSM-III-R, Score $\geq$ 22 on HAMD-21, 1-4 months symptom duration<br>Age 18-65 years | therapy resistance, increased risk of suicide, MDD with psychotic features, substance abuse                                                                     | Europe, Brazil                                    | HAMD-21 (mean change)    | HAMD-21 (response, remission), MADRS (mean change), social functioning (mean change), adverse events | EOS (Week 8 or last available visit) |
| 015          | None, only a pooled analysis (ref 5) | Ref 6                                    | MDD according to DSM-III-R, Score $\geq$ 22 on HAMD-21 (in the Canadian centre<br>HAMD-17 $\geq$ 22),  | MDD with psychotic features, cyclothymia / dysthymia, substance abuse, Mini Mental State Score < 22, increased risk of suicide<br>In the Canadian Centre: HAMD- | Australia, France, Germany, UK, Italy, and Canada | HAMD-21 (mean change)    | HAMD-21 (response, remission), MADRS (mean change) adverse events                                    | EOS (Week 6 or last available visit) |

|     |       |       |                                                                                                        |                                                                                                                                            |                                      |                       |                                                                                                      |                                      |
|-----|-------|-------|--------------------------------------------------------------------------------------------------------|--------------------------------------------------------------------------------------------------------------------------------------------|--------------------------------------|-----------------------|------------------------------------------------------------------------------------------------------|--------------------------------------|
|     |       |       | 1-4 months symptom duration<br>Age 18-65 years                                                         | reduction of 1 point or more after wash-out-phase                                                                                          |                                      |                       |                                                                                                      |                                      |
| 016 | Ref 7 | Ref 8 | MDD according to DSM-III-R, Score $\geq$ 22 on HAMD-21, 1-8 months symptom duration<br>Age 18-65 years | MDD with psychotic features, cyclothymia / dysthymia, therapy resistance, increased risk of suicide, substance abuse                       | Germany, Spain, Argentina, Australia | HAMD-21 (mean change) | HAMD-21 (response, remission), MADRS (mean change), social functioning (mean change), adverse events | EOS (Week 8 or last available visit) |
| 032 | None  | Ref 9 | MDD according to DSM-IV, Score $\geq$ 22 on HAMD-21 at Screening and Baseline<br>Age 18-               | MDD with psychotic features, cyclothymia, bipolar disorder, schizophrenia, substance related disorders, other psychotic disorders, therapy | Taiwan                               | HAMD-21 (mean change) | HAMD-21 (response, remission), social functioning (mean change), adverse events                      | EOS (Week 8 or last available visit) |

|     |        |        |                                                                                                                                                            |                                                                                                                                                                                                                                                                      |                                 |                              |                                                                                                                                       |                                             |
|-----|--------|--------|------------------------------------------------------------------------------------------------------------------------------------------------------------|----------------------------------------------------------------------------------------------------------------------------------------------------------------------------------------------------------------------------------------------------------------------|---------------------------------|------------------------------|---------------------------------------------------------------------------------------------------------------------------------------|---------------------------------------------|
|     |        |        | 65 years                                                                                                                                                   | resistance,<br>increased risk of<br>suicide                                                                                                                                                                                                                          |                                 |                              |                                                                                                                                       |                                             |
| 043 | Ref 10 | Ref 11 | MDD<br>according<br>to DSM-<br>IV, Score<br>≥ 22 on<br>HAMD-<br>21 (at<br>Screening<br>and<br>Baseline)<br>Age 18-<br>70 (in<br>Denmark<br>16-71)<br>years | MDD with<br>psychotic<br>features, therapy<br>resistance,<br>increased risk of<br>suicide,<br>cyclothymia /<br>dysthymia,<br>bipolar disorder,<br>schizophrenia,<br>substance related<br>disorders, other<br>psychotic<br>disorders,<br>increased risk of<br>suicide | Scandinavia                     | HAMD-<br>21 (mean<br>change) | HAMD-21<br>(response,<br>remission),<br>MADRS<br>(mean<br>change),<br>social<br>functioning<br>(mean<br>change),<br>adverse<br>events | EOS (Week 24<br>or last<br>available visit) |
| 045 | None   | Ref 12 | MDD<br>according<br>to DSM-<br>IIIR,<br>Score ≥<br>22 und <<br>35 on<br>HAMD-<br>21 at<br>Screening<br>and                                                 | MDD with<br>psychotic<br>features,<br>cyclothymia /<br>dysthymia,<br>bipolar disorder,<br>schizophrenia,<br>therapy<br>resistance,<br>substance abuse,<br>increased risk of                                                                                          | Western<br>Europe and<br>Russia | HAMD-<br>21 (mean<br>change) | HAMD-21<br>(response,<br>remission),<br>MADRS<br>(mean<br>change),<br>adverse<br>events                                               | EOS (Week 6<br>or last<br>available visit)  |

|     |                                                            |        | Baseline<br>Age 18-<br>65 years                                                           | suicide, high<br>dosages of<br>benzodiazepines                                                                                                                                                                          |                   |                           |                                                                                                                                                                                                                                                                          |                                            |
|-----|------------------------------------------------------------|--------|-------------------------------------------------------------------------------------------|-------------------------------------------------------------------------------------------------------------------------------------------------------------------------------------------------------------------------|-------------------|---------------------------|--------------------------------------------------------------------------------------------------------------------------------------------------------------------------------------------------------------------------------------------------------------------------|--------------------------------------------|
| 046 | None                                                       | Ref 13 | MDD<br>according<br>to DSM-<br>IV, Score<br>≥ 20 on<br>HAMD-<br>17<br>Age 18-<br>65 years | MDD with<br>psychotic<br>features,<br>cyclothymia,<br>bipolar disorder,<br>schizophrenia,<br>substance related<br>disorders, other<br>psychotic<br>disorders,<br>therapy<br>resistance,<br>increased risk of<br>suicide | USA and<br>Canada | MADRS<br>(mean<br>change) | HAMD-21<br>(mean<br>change,<br>response,<br>remission),<br>MADRS<br>(response,<br>remission),<br>quality of<br>life (2<br>domains of<br>the SF-36,<br>mean<br>change),<br>social<br>functioning<br>(mean<br>change),<br>energy<br>(mean<br>change),<br>adverse<br>events | EOS (Week 8<br>or last<br>available visit) |
| 047 | Yes, ref 14,<br>although the<br>data for the<br>full study | Ref 15 | MDD<br>according<br>to DSM-<br>IV, Score                                                  | MDD with<br>psychotic<br>features,<br>cyclothymia,                                                                                                                                                                      | USA               | MADRS<br>(mean<br>change) | HAMD-21<br>(mean<br>change,<br>response,                                                                                                                                                                                                                                 | EOS (Week 8<br>or last<br>available visit) |

|     |                                    |        |                                                                                           |                                                                                                                                                                                          |     |                              |                                                                                                                                                                                                                              |                                            |
|-----|------------------------------------|--------|-------------------------------------------------------------------------------------------|------------------------------------------------------------------------------------------------------------------------------------------------------------------------------------------|-----|------------------------------|------------------------------------------------------------------------------------------------------------------------------------------------------------------------------------------------------------------------------|--------------------------------------------|
|     | population<br>were not<br>reported |        | ≥ 20 on<br>HAMD-<br>17<br>Age 18-<br>65 years                                             | bipolar disorder,<br>schizophrenia,<br>substance related<br>disorders, other<br>psychotic<br>disorders,<br>therapy<br>resistance,<br>increased risk of<br>suicide                        |     |                              | remission),<br>MADRS<br>(response,<br>remission),<br>quality of<br>life (2<br>domains of<br>the SF-36,<br>mean<br>change),<br>social<br>functioning<br>(mean<br>change),<br>energy<br>(mean<br>change),<br>adverse<br>events |                                            |
| 049 | None                               | Ref 16 | MDD<br>according<br>to DSM-<br>IV, Score<br>≥ 22 on<br>HAMD-<br>21<br>Age 18-<br>65 years | MDD with<br>psychotic<br>features,<br>cyclothymia /<br>dysthymia,<br>bipolar disorder,<br>therapy<br>resistance,<br>schizophrenia,<br>substance related<br>disorders, other<br>psychotic | USA | HAMD-<br>21 (mean<br>change) | HAMD-21<br>(response,<br>remission),<br>MADRS<br>(mean<br>change),<br>adverse<br>events                                                                                                                                      | EOS (Week 8<br>or last<br>available visit) |

|     |                                                                     |        |                                                                                                  |                                                                                                                                                                                                                                               |                |                       |                                                                                                                                                                       |                                      |
|-----|---------------------------------------------------------------------|--------|--------------------------------------------------------------------------------------------------|-----------------------------------------------------------------------------------------------------------------------------------------------------------------------------------------------------------------------------------------------|----------------|-----------------------|-----------------------------------------------------------------------------------------------------------------------------------------------------------------------|--------------------------------------|
|     |                                                                     |        |                                                                                                  | disorders, history of axis-IV disorders with elevated probability of placebo-response, increased risk of suicide                                                                                                                              |                |                       |                                                                                                                                                                       |                                      |
| 050 | Yes, ref 17, although only data on sexual dysfunction were reported | Ref 18 | MDD according to DSM-IV, Score $\geq 22$ on HAM-D-21 (at Screening and Baseline) Age 18-65 years | MDD with psychotic features, cyclothymia / dysthymia, bipolar disorder, schizophrenia, therapy resistance, substance related disorders, increased risk of suicide, history of axis-IV disorders with elevated probability of placebo-response | USA            | HAMD-21 (mean change) | HAMD-21 (response, remission), MADRS (mean change), social functioning (mean change), quality of life (mean change), sexual dysfunction (mean change), adverse events | EOS (Week 8 or last available visit) |
| 052 | Yes, ref 19, although the                                           | Ref 20 | MDD according                                                                                    | MDD with psychotic                                                                                                                                                                                                                            | Western Europe | HAMD-17 (mean         | MADRS (mean                                                                                                                                                           | EOS (Week 8 or last                  |

|     |                                                      |        |                                                                                       |                                                                                                                                                                                                          |                             |                              |                                                                                                                                                |                                      |
|-----|------------------------------------------------------|--------|---------------------------------------------------------------------------------------|----------------------------------------------------------------------------------------------------------------------------------------------------------------------------------------------------------|-----------------------------|------------------------------|------------------------------------------------------------------------------------------------------------------------------------------------|--------------------------------------|
|     | data for the full study population were not reported |        | to DSM-IV, HAMD-21-Score between 22 and 35 at Screening and Baseline Age: 18-65 years | features, substance related disorders, cyclothymia / dysthymia, bipolar disorder, schizophrenia, other psychotic disorders, therapy resistance vs. test- or control-substance, increased risk of suicide |                             | change, response, remission) | change, response, remission), social functioning (mean change), quality of life (mean change, sexual dysfunction (mean change), adverse events | available visit)                     |
| 091 | Refs 21 and 22                                       | Ref 23 | MDD according to DSM-III-R, Score $\geq$ 20 on HAMD-21 Age 18-65 years                | Placebo responder ( $\geq$ 20% improvement on HAMD), increased risk of suicide, psychotic disorder, schizophrenia, schizophreniform disorders, delusional disorder, substance abuse                      | Brazil, Canada <sup>s</sup> | HAMD-21 (mean change)        | HAMD-21 (response), adverse events                                                                                                             | EOS (Week 6 or last available visit) |

|                                |        |    |                                                                        |                                                                                                                 |        |               |                                            |                                      |
|--------------------------------|--------|----|------------------------------------------------------------------------|-----------------------------------------------------------------------------------------------------------------|--------|---------------|--------------------------------------------|--------------------------------------|
| Berlanga and Flores-Ramos 2006 | Ref 24 | No | MDD according to DSM-IV, Score $\geq 18$ on HAMD-21<br>Age 18-40 years | Psychotic symptoms, substance abuse, history of manic, hypomanic or mixed episodes, severe personality disorder | Mexico | Not available | HAMD-21 (mean change, response, remission) | EOS (Week 8 or last available visit) |
|--------------------------------|--------|----|------------------------------------------------------------------------|-----------------------------------------------------------------------------------------------------------------|--------|---------------|--------------------------------------------|--------------------------------------|

\*As a matter of principle, the German Institute for Quality and Efficiency in Health Care requests documents compliant with the CONSORT criteria from manufacturers on all relevant trials selected. If cooperative, manufacturers usually provide the full clinical study report; that is, a written description of the study that follows the guidelines of the International Conference on Harmonisation.<sup>25</sup>

†Time point of measurement: remission / response: rate at EOS (planned time point of last visit or last available visit); mean change for given endpoint: change from baseline to EOS (planned time point of last visit or last available visit); adverse events: rate of patients with at least one adverse event between baseline and EOS (planned time point of last visit or last available visit)

‡Only addendum.

§44 of the 56 patients included are from one Brazilian centre

DSM: Diagnostic and Statistical Manual; EOS: End of study; HAMD: Hamilton Depression Scale; MADRS: Montgomery-Åsberg Depression Rating Scale; MDD: major depressive disorder.

## References

- 1 Andreoli V, Caillard V, Deo RS, Rybakowski JK, Versiani M. Reboxetine, a new noradrenaline selective antidepressant, is at least as effective as fluoxetine in the treatment of depression. *J Clin Psychopharmacol* 2002;22:393-9.
- 2 Dubini A, Bosc M, Polin V. Noradrenaline-selective versus serotonin-selective antidepressant therapy: differential effects on social functioning. *J Psychopharmacol* 1997;11:17-23S.
- 3 Dubini A, Bosc M, Polin V. Do noradrenaline and serotonin differentially affect social motivation and behaviour? *Eur Neuropsychopharmacol* 1997;7:49-55S.
- 4 Pharmacia Limited. Multicentre, multinational double-blind study of the activity and tolerability of reboxetine vs fluoxetine and placebo in patients suffering from major depressive episodes (phase III): results of patient self-evaluation assessment instrument; addendum to final report no 9550080 of study CTN014-FCE20124. 1995. [www.iqwig.de/download/Studie\\_014.pdf](http://www.iqwig.de/download/Studie_014.pdf).

- 5 Ferguson JM, Mendels J, Schwart GE. Effects of reboxetine on Hamilton Depression Rating Scale factors from randomized, placebo-controlled trials in major depression. *Int Clin Psychopharmacol* 2002;17:45-51.
- 6 Pharmacia Limited. Multicentre, multinational double-blind study of the activity and tolerability of reboxetine vs imipramine and placebo in patients suffering from major depressive episodes (phase III): final report of study CTN015-FCE20124. 1995. [www.iqwig.de/download/Studienbericht\\_zu\\_Studie\\_015.pdf](http://www.iqwig.de/download/Studienbericht_zu_Studie_015.pdf).
- 7 Massana J, Möller HJ, Burrows GD, Montenegro RM. Reboxetine: a double-blind comparison with fluoxetine in major depressive disorder. *Int Clin Psychopharmacol* 1999;14:73-80.
- 8 Pharmacia Limited. Multicentre, multinational double-blind study of the activity and tolerability of reboxetine vs fluoxetine in patients suffering from major depressive episodes (phase III): final report of study CTN016-FCE20124. 1995. [www.iqwig.de/download/Studienbericht\\_zu\\_Studie\\_016.pdf](http://www.iqwig.de/download/Studienbericht_zu_Studie_016.pdf).
- 9 Pharmacia Limited. Reboxetine (PNU-155950E) vs fluoxetine in a double-blind study for the treatment of major depressive disorders in Taiwan: study report for M/2020/0032. 2001. [www.iqwig.de/download/Studie\\_032.pdf](http://www.iqwig.de/download/Studie_032.pdf).
- 10 Langworth S, Bodlund O, Agren H. Efficacy and tolerability of reboxetine compared with citalopram: a double-blind study in patients with major depressive disorder. *J Clin Psychopharmacol* 2006;26:121-7.
- 11 Pharmacia Limited. Efficacy and tolerability of reboxetine (PNU-155950E) compared to citalopram in a double-blind study in patients with major depressive disorder: study no Z2020 0043; abbreviated study report; final version. 2003. [www.iqwig.de/download/Studie\\_043.pdf](http://www.iqwig.de/download/Studie_043.pdf).
- 12 Pharmacia & Upjohn. Comparison of placebo and three fixed doses of reboxetine in a population of patients with major depression: a phase II, double-blind, randomized, parallel group, multicenter study of 3 fixed doses of reboxetine or placebo, given orally twice daily to adult patients with major depressive disorder; final report of the trial 95-CRBX-045. 2001. [www.iqwig.de/download/Studienbericht\\_zu\\_Studie\\_045.pdf](http://www.iqwig.de/download/Studienbericht_zu_Studie_045.pdf).
- 13 Pharmacia & Upjohn. Reboxetine, placebo, and paroxetine comparison in patients with major depressive disorder: a phase III, randomized, double-blind, placebo- and active-treatment-controlled, parallel-group, 8-week study of reboxetine, given orally twice daily to adult patients with major depressive disorder; final report of the study protocol M/2020/0046. 2001. [www.iqwig.de/download/Studie\\_046.pdf](http://www.iqwig.de/download/Studie_046.pdf).
- 14 Ferguson JM, Wesnes KA, Schwartz GE. Reboxetine versus paroxetine versus placebo: effects on cognitive functioning in depressed patients. *Int Clin Psychopharmacol* 2003;18:9-14.
- 15 Pharmacia & Upjohn. Reboxetine, placebo, and paroxetine comparison in patients with major depressive disorder: a phase III, randomized, double-blind, placebo- and active-treatment-controlled, parallel-group, 8-week study of reboxetine, given orally twice daily to adult patients with major depressive disorder: final report of the study protocol M/2020/0047. 2001. [www.iqwig.de/download/Studie\\_047.pdf](http://www.iqwig.de/download/Studie_047.pdf).

- 16 Pharmacia & Upjohn. Reboxetine (PNU-155950E) versus placebo in the treatment of major depressive disorders: final report of the trial protocol number 97-CRBX049. 2001. [www.iqwig.de/download/Studienbericht\\_zu\\_Studie\\_049.pdf](http://www.iqwig.de/download/Studienbericht_zu_Studie_049.pdf).
- 17 Clayton AH, Zajecka J, Ferguson JM, Filipiak-Reisner JK, Brown MT, Schwartz GE. Lack of sexual dysfunction with the selective noradrenaline reuptake inhibitor reboxetine during treatment for major depressive disorder. *Int Clin Psychopharmacol* 2003;18:151-6.
- 18 Pharmacia & Upjohn. Reboxetine (PNU-155950E) versus placebo and fluoxetine in a controlled, randomized, double-blind, multicenter study of treatment in major depressive disorders: final report of the study protocol 97-CRBX-050. 2001. [www.iqwig.de/download/Studie\\_050.pdf](http://www.iqwig.de/download/Studie_050.pdf).
- 19 Baldwin D, Bridgman K, Buis C. Resolution of sexual dysfunction during double-blind treatment of major depression with reboxetine or paroxetine. *J Psychopharmacol* 2006;20:91-6.
- 20 Pharmacia & Upjohn. Reboxetine (PNU-155950E) vs paroxetine in a double-blind, multinational study of treatment in major depressive disorder: final report of the study 97-CRBX-052. 2004. [www.iqwig.de/download/Studie\\_052.pdf](http://www.iqwig.de/download/Studie_052.pdf).
- 21 Versiani M, Amin M, Chouinard G. Double-blind, placebo-controlled study with reboxetine in inpatients with severe major depressive disorder. *J Clin Psychopharmacol* 2000;20:28-34.
- 22 Versiani M. The selective noradrenaline re-uptake inhibitor reboxetine has an early onset of antidepressant action. *Int J Psychiatry Clin Pract* 2000;4:293-7.
- 23 Pharmacia Limited. Phase II placebo-controlled clinical study with reboxetine in major depressions: study CTN:20124/ADE 091; clinical study report. 1993. [www.iqwig.de/download/Studienbericht\\_zu\\_Studie\\_091.pdf](http://www.iqwig.de/download/Studienbericht_zu_Studie_091.pdf).
- 24 Berlanga C, Flores-Ramos M. Different gender response to serotonergic and noradrenergic antidepressants: a comparative study of the efficacy of citalopram and reboxetine. *J Affect Disord* 2006;95:119-23.
- 25 International Conference on Harmonisation of Technical Requirements for Registration of Pharmaceuticals for Human Use. ICH harmonised tripartite guideline: structure and content of clinical study reports E3; current step 4 version. 1995. [www.ich.org/LOB/media/MEDIA479.pdf](http://www.ich.org/LOB/media/MEDIA479.pdf).
