# Supplementary material
Source: PubMed Central journal article supplement (PMC4787893)
Supplement: eydd782797.w2_default.pdf [file eydd782797.w2_default.pdf]

**Web figure A** Assay sensitivity in three arm placebo controlled and selective serotonin reuptake inhibitor controlled trials

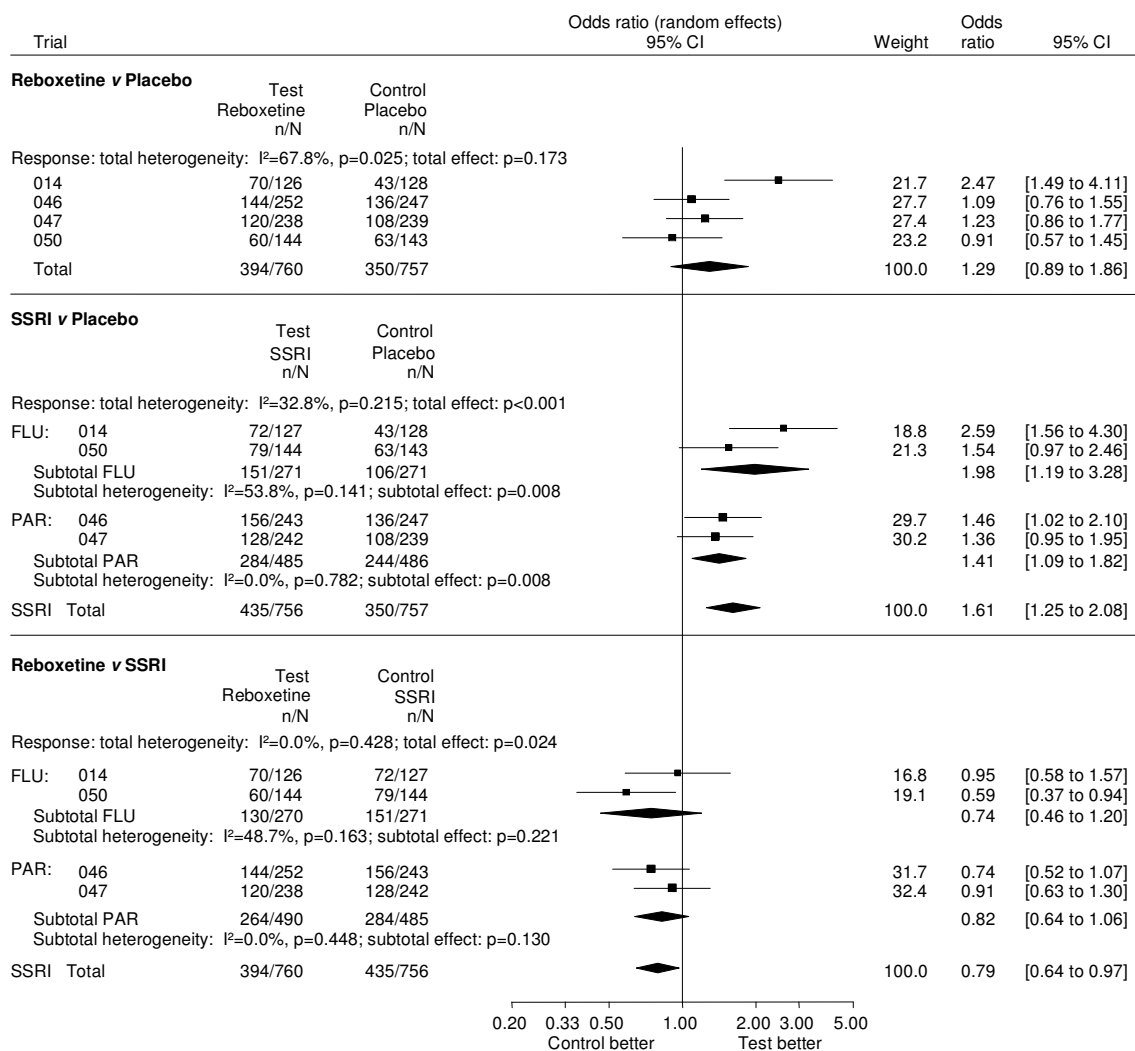

Timepoint of measurement for each study: response rate at end of study (planned time point of last visit or last available visit). For duration of individual studies see table 2.  
 CI, confidence interval; FLU, fluoxetine; n, number of patients with event; N, number of patients in treatment group; PAR, paroxetine; SSRI, selective serotonin reuptake inhibitor.
